# Supplementary material for: Local Inequalities in Health Behaviours: Longitudinal Findings from the Stockton-On-Tees Cohort Study
Source: MDPI journal article supplement (doi:10.3390/ijerph182111018), 2021-10-20
Supplement: s1 [file s1]

**Supplementary Materials:** The following are available online at [www.mdpi.com/article/10.3390/ijerph182111018/s1](http://www.mdpi.com/article/10.3390/ijerph182111018/s1),

**Table S1:** Associations between health behaviours (smoking, alcohol, 5 portions of fruits and vegetables/ day, frequent exercise) and material socio-economic, material physical environmental, and psychosocial explanatory variables.

**Table S2.** Questions for behavioural outcomes

**Table S1. Associations between health behaviours (smoking, alcohol, 5 portions of fruits and vegetables/ day, frequent exercise) and material socio-economic, material physical environmental, and psychosocial explanatory variables**

| Type                 | Variables                          | Smoking                                        | Alcohol Use        | Fruits, Veg (5 a day) | Frequent exercise  |
|----------------------|------------------------------------|------------------------------------------------|--------------------|-----------------------|--------------------|
|                      |                                    | Odd ratio (OR) and 95% Confidence Intervals CI |                    |                       |                    |
| Material             | Employed                           | 0.45 (0.26, 0.76)*                             | 2.34 (1.54, 3.56)* | 1.05 (0.76, 1.46)     | 0.90 (0.59, 1.37)  |
|                      | Education: Degree or higher        | 0.09 (0.03, 0.22)*                             | 2.60 (1.55, 4.34)* | 2.05 (1.16, 3.62)*    | 2.67 (1.37, 5.20)* |
|                      | Education: Higher diploma/ A level | 0.22 (0.11, 0.43)*                             | 1.64 (0.95, 2.83)  | 1.18 (0.79, 1.78)     | 1.74 (0.99, 3.06)  |
|                      | GCSE                               | 0.35 (0.21, 0.60)                              | 1.26 (0.85, 1.87)  | 1.20 (0.75, 1.90)     | 1.19 (0.82, 1.74)  |
|                      | Education: Entry level             | Ref                                            | Ref                | Ref                   | Ref                |
|                      | Tenure : Owned outright            | 0.37 (0.24, 0.58)*                             | 2.21 (1.46, 3.35)* | 1.67 (1.09, 2.56)*    | 1.67 (1.05, 2.64)* |
|                      | Tenure: Mortgaged                  | 0.29 (0.17, 0.49)*                             | 1.73 (1.17, 2.55)* | 1.56 (0.92, 2.67)*    | 1.47 (0.90, 2.39)  |
|                      | Tenure: Rented, rent free          | Ref                                            | Ref                | Ref                   | Ref                |
|                      | Receiving benefit                  | 1.96 (1.03, 3.74)*                             | 0.52 (0.32, 0.85)* | 0.95 (0.64, 1.41)*    | 0.51 (0.33, 0.78)* |
|                      | Income                             | 1.00 (1.00, 1.00)                              | 1.00 (1.00, 1.00)  | 1.00 (1.00, 1.00)     | 1.00 (1.00, 1.00)  |
|                      | Housing benefit                    | 2.14 (1.33, 3.46)*                             | 0.48 (0.35, 0.66)* | 0.75 (0.50, 1.13)     | 0.68 (0.50, 0.93)* |
|                      | Workless household                 | 2.26 (1.40, 3.67)*                             | 0.53 (0.37, 0.75)* | 1.05(0.76, 1.44)      | 0.77 (0.54, 1.09)  |
| Physical environment | Too dark room                      | 1.04 (0.67, 1.61)                              | 0.53 (0.34, 0.83)* | 0.50 (0.26, 0.96)*    | 0.81 (0.55, 1.19)  |
|                      | Damp in house                      | 0.81 (0.53, 1.23)                              | 1.32 (0.83, 2.11)  | 0.70 (0.43, 1.14)     | 0.67 (0.41, 1.10)  |
|                      | Warmth in winter                   | 1.28 (0.81, 2.00)                              | 0.89 (0.58, 1.38)  | 0.81 (0.46, 1.42)     | 1.13 (0.78, 1.62)  |
|                      | Noise in the area                  | 1.54 (1.01, 2.34)*                             | 1.09 (0.70, 1.71)  | 1.56 (1.06, 2.30)*    | 1.44 (0.89, 2.31)  |
|                      | Pollution in the area              | 1.10 (0.64, 1.89)                              | 0.86 (0.56, 1.30)  | 1.10 (0.71, 1.69)     | 1.15 (0.71, 1.88)  |
|                      | Crime in the area                  | 1.62 (1.10, 2.38)*                             | 0.99 (0.66, 1.47)  | 0.77 (0.48, 1.24)     | 1.04 (0.72, 1.51)  |
| Psychosocial         | Feel safe                          | 1.31 (0.91, 1.90)                              | 0.71 (0.49, 1.04)  | 0.73 (0.40, 1.34)     | 0.65 (0.38, 1.10)  |
|                      | Often lack companion               | 2.07 (1.14, 3.74)*                             | 0.83 (0.51, 1.36)  | 0.85 (0.46, 1.57)     | 0.69 (0.43, 1.10)  |
|                      | Often feel left out                | 1.61 (0.97, 2.68)                              | 0.59 (0.35, 0.99)* | 1.04 (0.54, 2.01)     | 1.04 (0.68, 1.60)  |
|                      | Often feel Isolated                | 2.07 (1.20, 3.55)*                             | 0.44 (0.27, 0.79)* | 0.80 (0.39, 1.62)     | 1.15 (0.77, 1.70)  |
|                      | Social meetings                    | 1.20 (0.97, 1.49)                              | 1.04 (0.84, 1.30)  | 1.27 (1.03, 1.57)*    | 1.26 (1.06, 1.50)* |
|                      | Happiness scale                    | 0.87 (0.79, 0.95)*                             | 0.96 (0.88, 1.06)  | 1.09 (1.00, 1.19)*    | 1.15 (1.05, 1.26)* |

\*Denotes significant differences. All results are adjusted for age and sex

**Table S2. Questions for behavioural outcomes**

**1. Smoking:**

|               |      |                          |
|---------------|------|--------------------------|
| Do you smoke? | Yes* | <input type="checkbox"/> |
|               | No   | <input type="checkbox"/> |

**2. Alcohol drinking:**

|                       |      |                          |
|-----------------------|------|--------------------------|
| Do you drink alcohol? | Yes* | <input type="checkbox"/> |
|                       | No   | <input type="checkbox"/> |

**3. Fruits and vegetables (5 portions/day)\*:**

|                                                                                                                                                                                                 |                      |                      |
|-------------------------------------------------------------------------------------------------------------------------------------------------------------------------------------------------|----------------------|----------------------|
| On a usual day, how many portions of fruit and vegetables do you eat?<br>Think of a portion as a large piece of fruit or about a handful of vegetables.<br>(please see SHOWCARD I for example). | number               |                      |
|                                                                                                                                                                                                 | <input type="text"/> | <input type="text"/> |

**4. Frequent exercise:**

|                                                   |                          |
|---------------------------------------------------|--------------------------|
| How often do you do exercise/physical activities? | Tick one                 |
| Everyday*                                         | <input type="checkbox"/> |
| Most Days*                                        | <input type="checkbox"/> |
| A couple of times a week*                         | <input type="checkbox"/> |
| Once a week                                       | <input type="checkbox"/> |
| Less than once a week                             | <input type="checkbox"/> |
| Never                                             | <input type="checkbox"/> |

\*reflects the categories that were considered yes for binary outcomes.
